# Supplementary material
Source: PubMed Central journal article supplement (PMC7055717)
Supplement: NIHMS1068387-supplement-Figures_S1-S3.pdf [file NIHMS1068387-supplement-Figures_S1-S3.pdf]

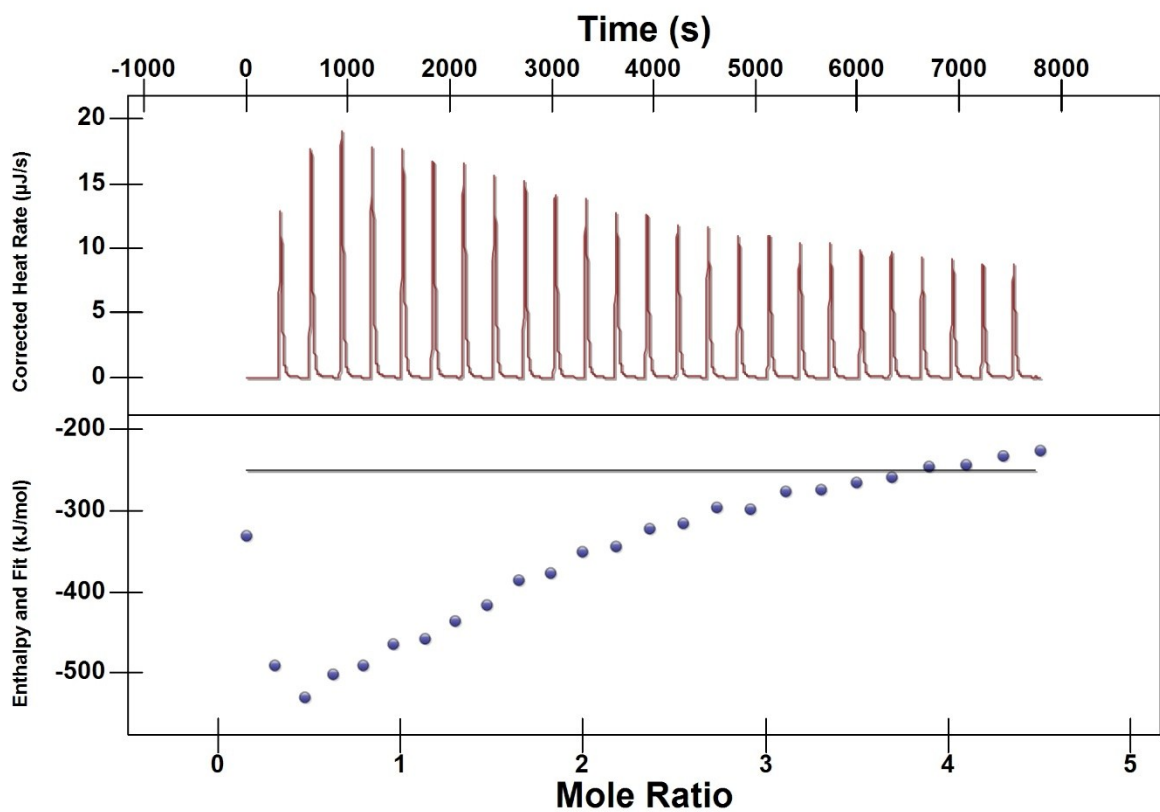

**Figure S1. Isothermal titration calorimetry (ITC) of boscalid (500  $\mu\text{M}$ ) into  $\text{TiO}_2$  (E171) (37.6  $\mu\text{M}$ ) in water.** Thermogram showing the experimentally derived curve with raw heat rate  $\mu\text{J/s}$  versus time (s) (*top*); and the calculated binding isotherm with change in enthalpy  $\text{kJ/mol}$  versus boscalid- $\text{TiO}_2$  molar ratio (*bottom*)

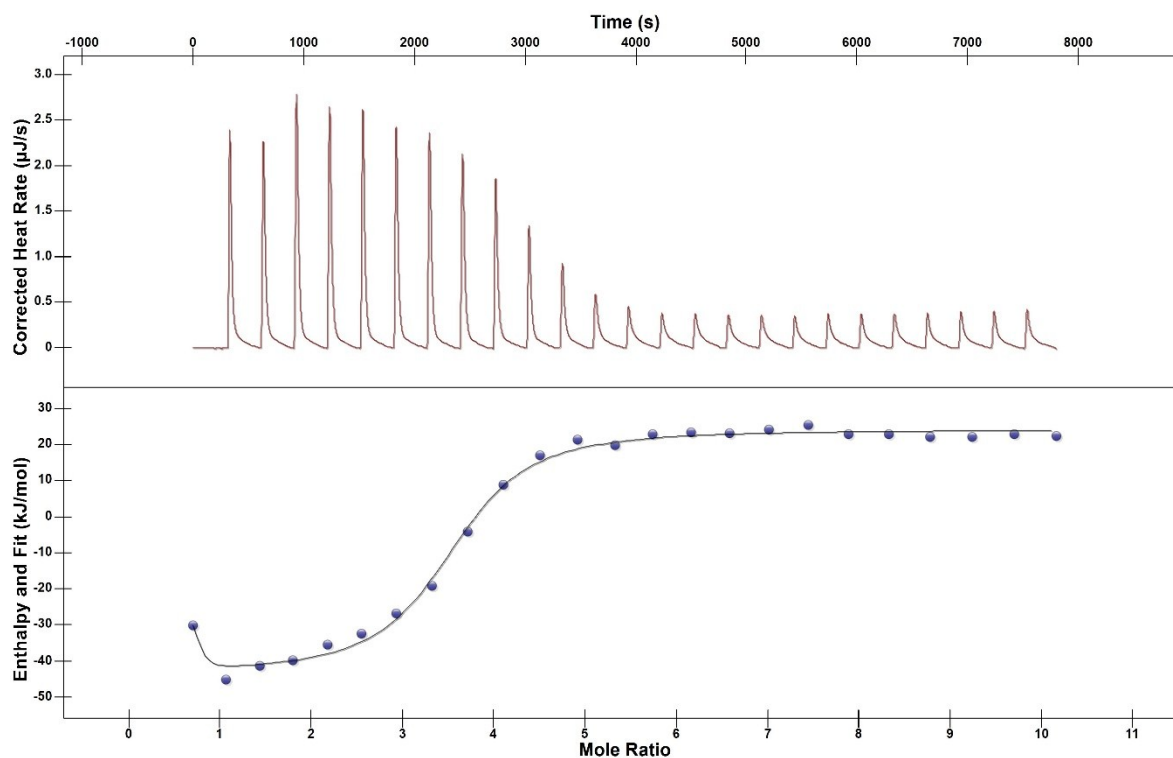

**Figure S2. Isothermal titration calorimetry (ITC) of boscalid (500  $\mu\text{M}$ ) into  $\text{SiO}_2$  (E551) (16.6  $\mu\text{M}$ ) in water.** Thermogram showing the experimentally derived curve with raw heat rate  $\mu\text{J/s}$  versus time (s) (*top*); and the calculated binding isotherm with change in enthalpy  $\text{kJ/mol}$  versus boscalid- $\text{SiO}_2$  molar ratio (*bottom*)

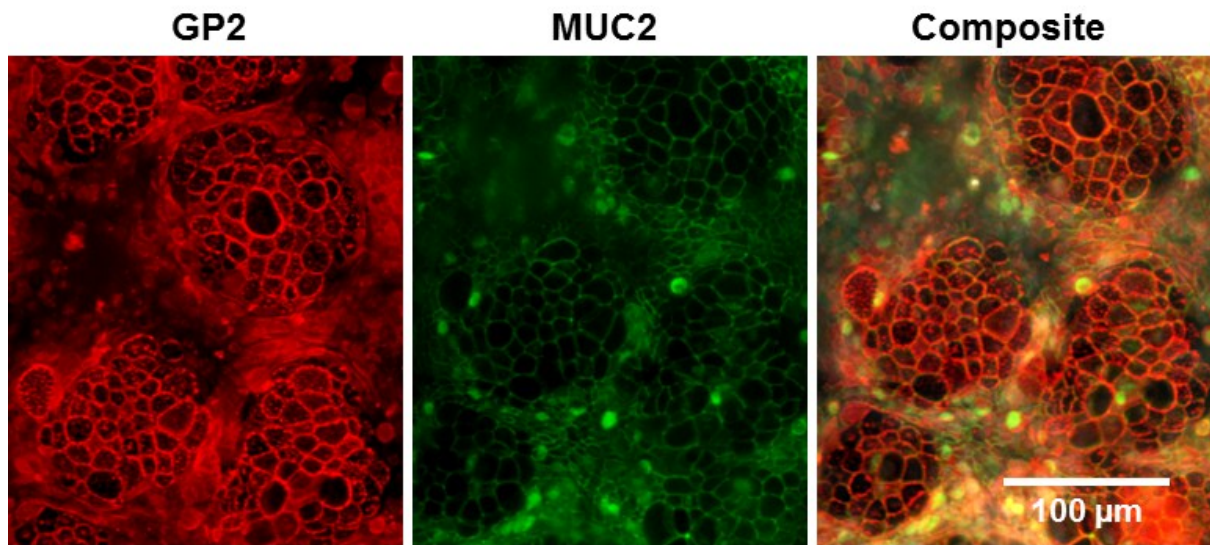

**Figure S3. Triculture small intestinal model morphology by confocal microscopy.** Mature tricultures grown on transwell inserts were fixed, permeabilized, immunostained for mucin (MUC2) and the M-cell marker, glycoprotein 2 (GP2). Adapted from DeLoid et al., *Part. Fibre Toxicol.*, 2017, 14, 40.
