# Supplementary material
Source: PubMed Central journal article supplement (PMC7055717)
Supplement: NIHMS1068387-supplement-Tables_S1-S2.pdf [file NIHMS1068387-supplement-Tables_S1-S2.pdf]

**Table S1. Thermodynamic parameters derived for boscalid-SiO<sub>2</sub> (E551) interaction in water using multiple sites model.**

| <b>Parameters</b>         | <b>Value</b> |
|---------------------------|--------------|
| K <sub>d1</sub> (M)       | 1.299E-9     |
| K <sub>d2</sub> (M)       | 1.012E-6     |
| n1                        | 0.492        |
| n2                        | 2.921        |
| ΔH <sub>1</sub> (kJ/mol)  | -36.38       |
| ΔH <sub>2</sub> (kJ/mol)  | -67.75       |
| ΔS <sub>1</sub> (J/mol·K) | 4.819E1      |
| ΔS <sub>2</sub> (J/mol·K) | -1.125E2     |

**Table S2 Simulated digestion stock and working solutions**

| <b>Solution</b>                                       | <b>Chemical</b>                             | <b>Mass/Volume</b> | <b>MW</b> | <b>Molarity</b> | <b>N ions</b> | <b>Osmolarity (Osm)</b> |
|-------------------------------------------------------|---------------------------------------------|--------------------|-----------|-----------------|---------------|-------------------------|
| <b>5 mM Phosphate buffer pH 7.0</b>                   |                                             |                    |           |                 |               |                         |
|                                                       | Potassium Phosphate                         | 0.6 g              | 136.09    | .005            | 2             | .010                    |
|                                                       | titrants (HCl, NaOH)                        |                    |           |                 |               | negl.                   |
|                                                       |                                             |                    |           |                 |               |                         |
|                                                       |                                             |                    |           |                 |               | Total: 0.010            |
| <b>Artificial Saliva Stock Solution (ASSS)</b>        |                                             |                    |           |                 |               |                         |
|                                                       | Sodium chloride                             | 1.594 g            | 58.44     | .0273           | 2             | .0546                   |
|                                                       | Ammonium nitrate                            | 0.328 g            | 80.05     | .0041           | 2             | .0082                   |
|                                                       | Potassium phosphate                         | 0.636 g            | 136.09    | .0047           | 2             | .0094                   |
|                                                       | Potassium chloride                          | 0.202 g            | 74.55     | .0027           | 2             | .0054                   |
|                                                       | Potassium citrate (monohydrate)             | 0.308 g            | 324.41    | .0009           | 2             | .0018                   |
|                                                       | Uric acid sodium salt                       | 0.021 g            | 190.09    | .0001           | 2             | .0002                   |
|                                                       | Urea                                        | 0.198 g            | 60.06     | .0033           | 1             | .0066                   |
|                                                       | Lactic acid sodium salt (Sodium DL-lactate) | 0.146 g            | 112.06    | .0013           | 2             | .0026                   |
|                                                       |                                             |                    |           |                 |               | Total: 0.0888           |
| <b>Artificial Saliva Work Solution (ASWS)</b>         |                                             |                    |           |                 |               |                         |
|                                                       | ASSS                                        | 20 ml              |           |                 |               | 0.0888                  |
|                                                       | Porcine gastric mucin type II               | 0.6g               |           |                 | 1             | negl.                   |
|                                                       |                                             |                    |           |                 |               | Total: 0.0888           |
| <b>Simulated Gastric Fluid Stock Solution (SGFSS)</b> |                                             |                    |           |                 |               |                         |
|                                                       | Sodium chloride                             | 2 g                | 58.44     | 0.342           | 2             | 0.684                   |
